# Supplementary material for: SIRT1 suppresses self-renewal of adult hippocampal neural stem cells
Source: Oxford University Press journal article supplement (doi:10.1242/dev.117937), 2014-12-02
Supplement: dev117937supp.pdf [file dev117937supp.pdf]

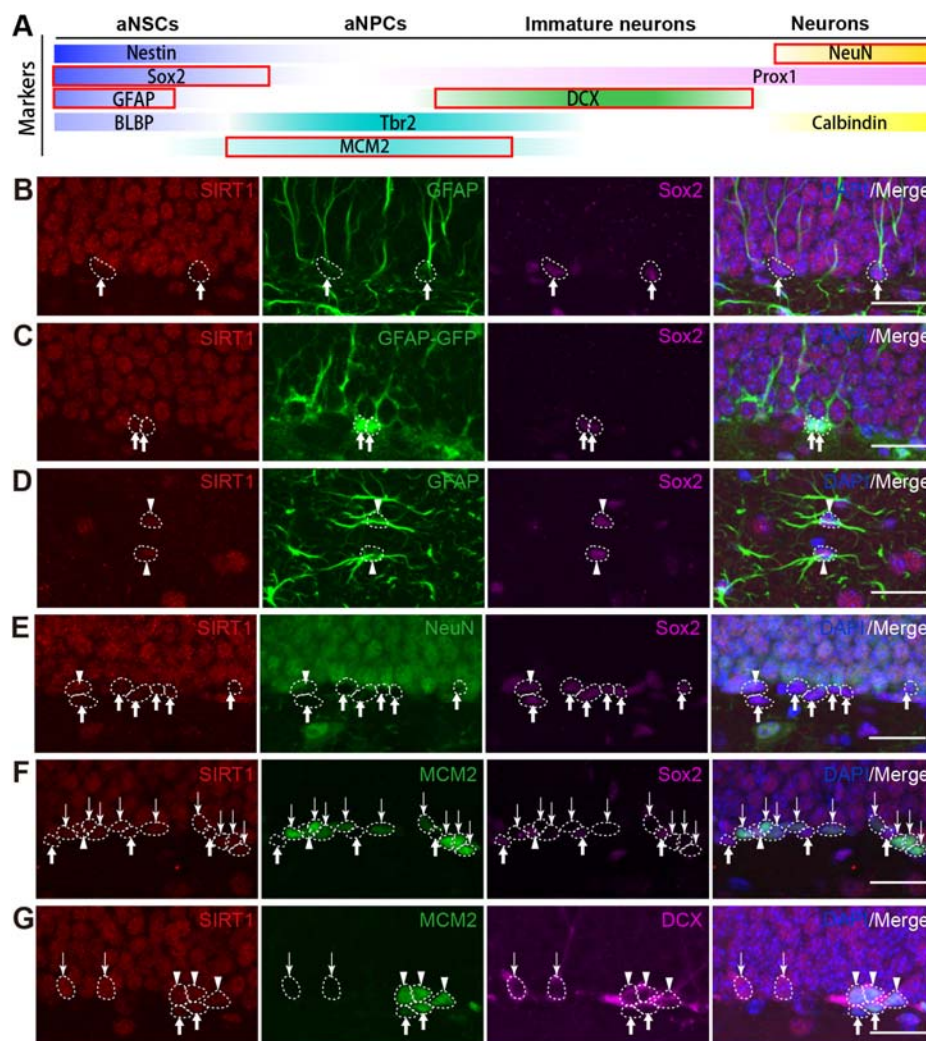

**Fig. S1. Expression pattern of SIRT1 during aNSC differentiation**

(A) Markers expressed by cells at different developmental stages of adult neurogenesis (modified from Ming and Song, 2011).

(B,D) Immunostaining of SIRT1, GFAP, and Sox2 in the SGZ (B) and the hilus (D) of mouse adult hippocampus. Bold arrows in B, GFAP<sup>+</sup>/Sox2<sup>+</sup> RGL aNSCs; arrowheads in D, GFAP<sup>+</sup> astrocytes.

(C) Immunostaining of SIRT1, GFP, and Sox2 in the SGZ of adult *Gfap-Gfp* transgenic mice. Bold arrows, GFP<sup>+</sup>/Sox2<sup>+</sup> RGL aNSCs.

(E,F,G) Additional examples of SIRT1 co-staining with different cell markers.

Scale bars, 25  $\mu$ m.

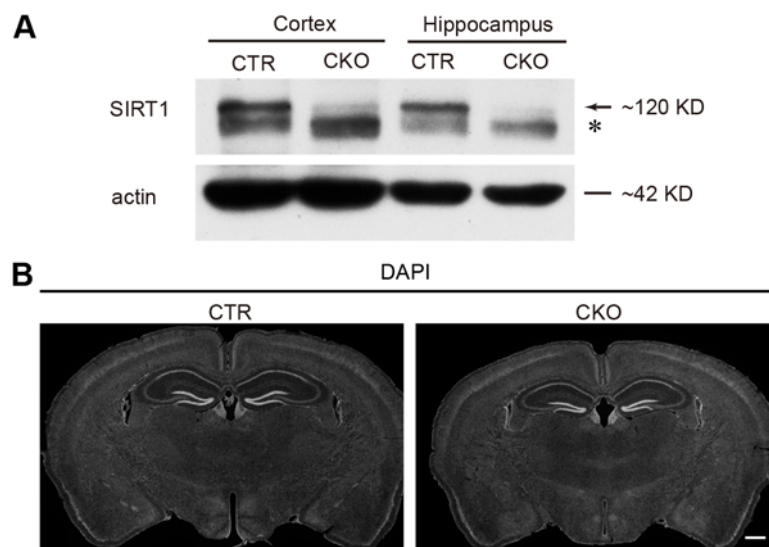

**Fig. S2. Brain anatomy of *Nestin-Cre;Sirt1<sup>flx/flx</sup>* conditional knockout (CKO)**

**mice**

**(A)** A nonfunctional mutant SIRT1 protein (marked by \*) was expressed in the cortex and hippocampus of CKO mice.

**(B)** DAPI-labeled coronal sections from a CKO mouse showing normal tissue structure as compared with a WT mouse. Scale bar, 500  $\mu$ m.

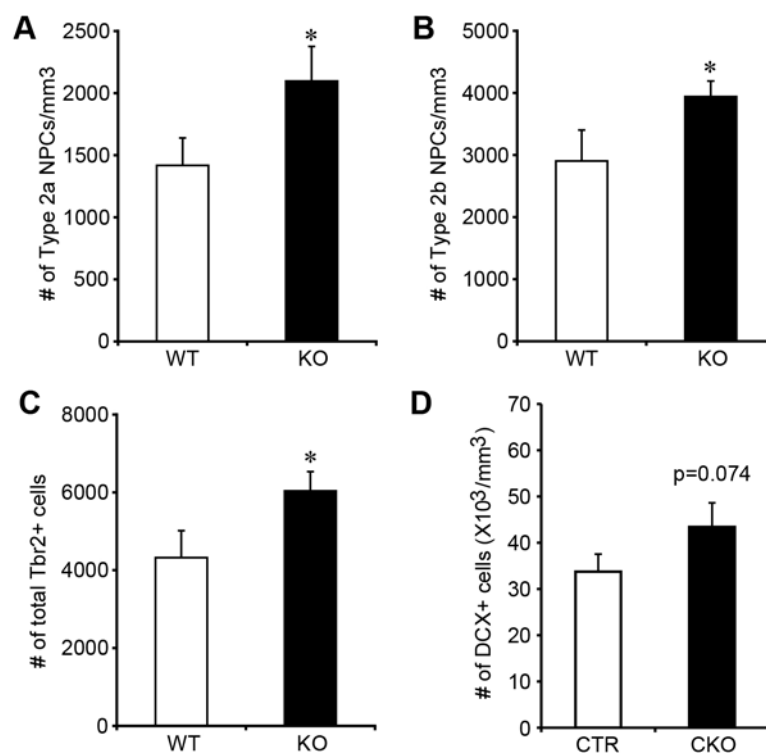

**Fig. S3. Type 2 aNPCs and immature neurons were increased in SIRT1 deleted mice**

(A,B,C) Number of Type 2a (Sox2<sup>+</sup>/Tbr2<sup>+</sup>) (A, \* $P = 0.013$ ), Type 2b (Sox2<sup>-</sup>/Tbr2<sup>+</sup>) (B, \* $P = 0.050$ ), and total Type 2 (Tbr2<sup>+</sup>) (C, \* $P = 0.024$ ) cells in the SGZ of WT and SIRT1 KO mice (n = 5 pairs of mice, 9 to 12 sections per animal, paired *t*-test).

(D) Quantitation of DCX<sup>+</sup> cells in control and CKO mice (n = 6 pairs of mice, 9 to 12 sections per animal,  $P = 0.074$ ).

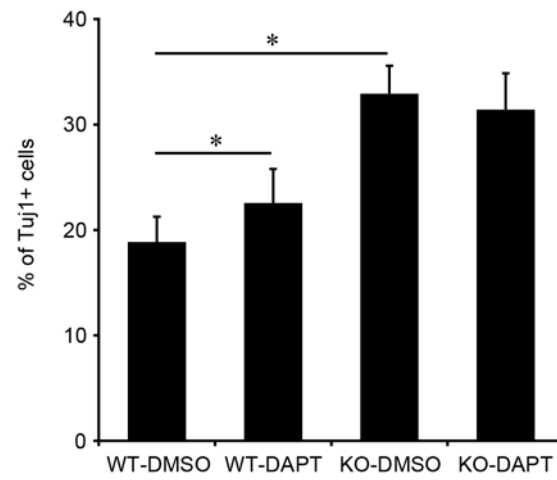

**Fig. S4. SIRT1 affected lineage specification of aNSCs/aNPCs *in vitro***

Quantitation of Tuj1<sup>+</sup> neurons among all cells labeled by DAPI (n = 5, paired

*t*-test, *P* = 0.014\*, 0.012\*).

**Table S1. Primary antibodies used in immunostaining and Western blotting**

| Primary antibody           | Species | Dilution          | Source                    |
|----------------------------|---------|-------------------|---------------------------|
| SIRT1                      | Rabbit  | 1:100 or<br>1:500 | Cell Signaling Technology |
| Sox2                       | Goat    | 1:100             | Santa Cruz Biotechnology  |
| NeuN                       | Mouse   | 1:1000            | Millipore                 |
| Nestin                     | Mouse   | 1:200             | Millipore                 |
| GFAP                       | Rabbit  | 1:500             | Dako                      |
| GFAP                       | Mouse   | 1:500             | Millipore                 |
| MCM2 (BM28)                | Mouse   | 1:300             | BD biosciences            |
| DCX                        | Goat    | 1:200             | Santa Cruz Biotechnology  |
| GFP                        | Chicken | 1:1000            | Abcam                     |
| GFP                        | Rabbit  | 1:1000            | Invitrogen                |
| BrdU                       | Mouse   | 1:500             | Millipore                 |
| Ki67                       | Rabbit  | 1:500             | Abcam                     |
| Tbr2                       | Rabbit  | 1:200             | Abcam                     |
| Actin                      | Mouse   | 1:5000            | Abcam                     |
| Activated Notch1<br>(NICD) | Rabbit  | 1:700             | Abcam                     |
| Tuj1                       | Mouse   | 1:1000            | Covance                   |

**Table S2. Primers used for qPCR**

| Prime<br>r  | Forward                      | Reverse                     |
|-------------|------------------------------|-----------------------------|
| <i>Dll4</i> | CTTGCTGTGGGTAAGATTTGGC       | AGATGACCCGGTAAGAGTAGC       |
| <i>Mfng</i> | GGCTCCTGTCTCTACGATACC        | GATGAAGATGTCGCCTAGCTG       |
| <i>Mib1</i> | ATTGGCATTTCGATGGAAATGTG<br>C | CTCTAACAGAACCCGTTCACTT<br>C |
| <i>Hes5</i> | AGATGCTCAGTCCCAAGGAG         | TAGCCCTCGCTGTAGTCCTG        |
| <i>Heyl</i> | AAGCGCAGAGGGATCATAGAG        | CCAATCGTCGCAATTCAGAAAG      |
| <i>Hey2</i> | GTGGGGAGCGAGAACAATTAC        | TGAGAGGTAGTTGTCGGTGAA       |

**Table S3. Summary of SIRT1-regulated genes involved in metabolism, neurogenesis, cell proliferation, and Notch signaling**

| GO ID      | GO term                                                | Number of genes | P value  | Genes                                                                                                                                                                                                                                                                                              |
|------------|--------------------------------------------------------|-----------------|----------|----------------------------------------------------------------------------------------------------------------------------------------------------------------------------------------------------------------------------------------------------------------------------------------------------|
| GO:0009893 | Positive regulation of metabolic process               | 42              | 1.6E-04  | <i>Ablim3, Apoa4, Bmp3, Camk1d, Camk4, Cbfa2t2, Cdkn1c, Cebpb, Ciita, Eng, Erbb4, Fgfr3, Foxc2, Gfi1b, Ghr, Gnal, Hand2, Hes5, Heyl, Hivep3, Hnf4a, Il22, Il2rb, Itch, Itga8, Klf2, Lck, Mbl2, Med13, Mesp1, Mlxipl, Nkx2-5, Npas2, Pbx2, Pf4, Plp1, Pou4f2, Sox10, Sox7, Sry, Taf9, Tnfrsf13c</i> |
| GO:0010604 | Positive regulation of macromolecule metabolic process | 39              | 1.62E-04 | <i>Ablim3, Bmp3, Camk4, Cbfa2t2, Cdkn1c, Cebpb, Ciita, Eng, Erbb4, Fgfr3, Foxc2, Gfi1b, Ghr, Hand2, Hes5, Heyl, Hivep3, Hnf4a, Il22, Il2rb, Itch, Itga8, Klf2, Lck, Mbl2, Med13, Mesp1, Mlxipl, Nkx2-5, Npas2, Pbx2, Pf4, Plp1, Pou4f2,</i>                                                        |

|                |                                                                       |    |          |                                                                                                                                                                                                                                                              |
|----------------|-----------------------------------------------------------------------|----|----------|--------------------------------------------------------------------------------------------------------------------------------------------------------------------------------------------------------------------------------------------------------------|
|                |                                                                       |    |          | <i>Sox10, Sox7, Sry, Taf9, Tnfrsf13c</i>                                                                                                                                                                                                                     |
| GO:<br>0010557 | Positive<br>regulation of<br>macromolecule<br>biosynthetic<br>process | 30 | 5.1E-04  | <i>Ablim3, Bmp3, Camk4, Cbfa2t2,<br/>Cdkn1c, Cebpb, Ciita, Eng, Erbb4,<br/>Foxc2, Hand2, Hes5, Heyl, Hivep3,<br/>Hnf4a, Il22, Itga8, Klf2, Med13,<br/>Mesp1, Mlxipl, Nkx2-5, Npas2, Pbx2,<br/>Pou4f2, Sox10, Sox7, Sry, Taf9,<br/>Tnfrsf13c</i>              |
| GO:<br>0031328 | Positive<br>regulation of<br>cellular<br>biosynthetic<br>process      | 32 | 5.42E-04 | <i>Ablim3, Apoa4, Bmp3, Camk4,<br/>Cbfa2t2, Cdkn1c, Cebpb, Ciita, Eng,<br/>Erbb4, Foxc2, Gnal, Hand2, Hes5,<br/>Heyl, Hivep3, Hnf4a, Il22, Itga8, Klf2,<br/>Med13, Mesp1, Mlxipl, Nkx2-5,<br/>Npas2, Pbx2, Pou4f2, Sox10, Sox7,<br/>Sry, Taf9, Tnfrsf13c</i> |
| GO:<br>0009891 | Positive<br>regulation of<br>biosynthetic<br>process                  | 32 | 7.52E-04 | <i>Ablim3, Apoa4, Bmp3, Camk4,<br/>Cbfa2t2, Cdkn1c, Cebpb, Ciita, Eng,<br/>Erbb4, Foxc2, Gnal, Hand2, Hes5,<br/>Heyl, Hivep3, Hnf4a, Il22, Itga8, Klf2,<br/>Med13, Mesp1, Mlxipl, Nkx2-5,<br/>Npas2, Pbx2, Pou4f2, Sox10, Sox7,<br/>Sry, Taf9, Tnfrsf13c</i> |



|                |                                                                                           |    |          |                                                                                                                                                                                                                                                             |
|----------------|-------------------------------------------------------------------------------------------|----|----------|-------------------------------------------------------------------------------------------------------------------------------------------------------------------------------------------------------------------------------------------------------------|
| GO:<br>0045935 | Positive<br>regulation of<br>nucleobase<br>containing<br>compound<br>metabolic<br>process | 30 | 8.06E-04 | <i>Ablim3, Bmp3, Camk4, Cbfa2t2, Cdkn1c, Cebpb, Ciita, Eng, Erbb4, Foxc2, Gnal, Hand2, Hes5, Heyl, Hivep3, Hnf4a, Il22, Itga8, Klf2, Med13, Mesp1, Mlxipl, Nkx2-5, Npas2, Pbx2, Pou4f2, Sox10, Sox7, Sry, Taf9</i>                                          |
| GO:<br>0022008 | Neurogenesis                                                                              | 35 | 2.75E-07 | <i>Ache, Bcl11a, Camk1d, Cbfa2t2, Ccr4, Cdkn1c, Cebpb, Celsr1, Clic5, D0H4S114, Dct, Dll4, Epha4, Exoc4, Fgfr3, Hand2, Helt, Hes5, Hey2, Heyl, Itga1, Kalrn, Kcnj10, Mesp1, Mib1, Nkx2-5, Nkx2-9, Plp1, Pmp22, Pou4f2, Prdm6, Robo2, Sox10, Syne1, Tnik</i> |
| GO:<br>0050767 | Regulation of<br>neurogenesis                                                             | 20 | 2.67E-06 | <i>Ache, Bcl11a, Camk1d, Cbfa2t2, D0H4S114, Dct, Dll4, Epha4, Fgfr3, Hes5, Hey2, Heyl, Kalrn, Mib1, Nkx2-5, Pmp22, Robo2, Sox10, Syne1, Tnik</i>                                                                                                            |
| GO:<br>0048699 | Generation of<br>neurons                                                                  | 30 | 1.13E-05 | <i>Ache, Bcl11a, Camk1d, Cbfa2t2, Ccr4, Cdkn1c, Cebpb, Celsr1, Clic5,</i>                                                                                                                                                                                   |

|                |                                                         |    |          |                                                                                                                                                                                                          |
|----------------|---------------------------------------------------------|----|----------|----------------------------------------------------------------------------------------------------------------------------------------------------------------------------------------------------------|
|                |                                                         |    |          | <i>D0H4S114, Dct, Dll4, Epha4, Fgfr3, Hand2, Helt, Hes5, Hey2, Heyl, Itgal, Kalrn, Mib1, Nkx2-5, Nkx2-9, Pmp22, Pou4f2, Robo2, Sox10, Syne1, Tnik</i>                                                    |
| GO:<br>0045664 | Regulation of<br>neuron<br>differentiation              | 16 | 3.96E-05 | <i>Ache, Bcl11a, Camk1d, Cbfa2t2, D0H4S114, Epha4, Hes5, Hey2, Heyl, Kalrn, Mib1, Nkx2-5, Pmp22, Robo2, Syne1, Tnik</i>                                                                                  |
| GO:<br>0042127 | Regulation of<br>cell proliferation                     | 29 | 4.13E-04 | <i>Btla, Cdkn1c, Dct, Dpp4, Eng, Erbb4, Fgfr3, Foxp2, Hand2, Hes5, Hey2, Hnf4a, Ido1, Il7, Itch, Itgal, Mlxipl, Ndr2, Nkx2-5, Nkx2-9, Pmp22, *Ptgs1, Slfn3, Sox10, Sox7, Tgm2, Tnfrsf13c, Tnmd, Tns3</i> |
| GO:<br>0007219 | Notch signaling<br>pathway                              | 7  | 4.4E-05  | <i>Dll4, Foxc2, Hes5, Hey2, Heyl, Mesp1, Mib1</i>                                                                                                                                                        |
| GO:<br>0045747 | Positive<br>regulation of<br>Notch signaling<br>pathway | 4  | 1.28E-04 | <i>Hes5, Hey2, Mesp1, Mfng</i>                                                                                                                                                                           |

GO analysis was carried out on putative SIRT1-regulated genes identified by screening microarray data. Significantly over-represented GO terms related to metabolism, neurogenesis, cell proliferation, and Notch signaling are summarized in this table.

**Table S4. Summary of metabolic pathways with gene enrichment in ‘Pathway to Gene’ analysis of putative SIRT1-regulated genes based on microarray data**

| Pathway DB | Name                                    | Hits | P value | Genes                                                                                                                              |
|------------|-----------------------------------------|------|---------|------------------------------------------------------------------------------------------------------------------------------------|
| Kegg       | Metabolic pathways                      | 19   | 0.0023  | <i>Acacb, Alox5, Cda, Ckmt1, Cyp2j13, Dct, Galnt3, Glt28d2, Gyk, Hk3, Idol, Mdh1, Nnmt, Otc, Pank1, Pgap1, Prps111, Ptgs1, Uox</i> |
| Biocarta   | Eicosanoid metabolism                   | 2    | 0.0095  | <i>Alox5, Ptgs1</i>                                                                                                                |
| Kegg       | Arachidonic acid metabolism             | 3    | 0.0265  | <i>Alox5, Cyp2j13, Ptgs1</i>                                                                                                       |
| Kegg       | Pyruvate metabolism                     | 2    | 0.0399  | <i>Acacb, Mdh1</i>                                                                                                                 |
| Kegg       | Fatty acid biosynthesis                 | 1    | 0.0548  | <i>Acacb</i>                                                                                                                       |
| Kegg       | Arginine and proline metabolism         | 2    | 0.061   | <i>Ckmt1, Otc</i>                                                                                                                  |
| Kegg       | Pantothenate and CoA biosynthesis       | 1    | 0.1066  | <i>Pank1</i>                                                                                                                       |
| Kegg       | Glyoxylate and dicarboxylate metabolism | 1    | 0.1191  | <i>Mdh1</i>                                                                                                                        |
| Kegg       | Nicotinate and nicotinamide             | 1    | 0.1674  | <i>Nnmt</i>                                                                                                                        |

|      |                                                             |   |        |                |
|------|-------------------------------------------------------------|---|--------|----------------|
|      | metabolism                                                  |   |        |                |
| Kegg | Glycosylphosphatidylinositol<br>(GPI) - anchor biosynthesis | 1 | 0.1733 | <i>Pgap1</i>   |
| Kegg | Galactose metabolism                                        | 1 | 0.1791 | <i>Hk3</i>     |
| Kegg | O-glycan biosynthesis                                       | 1 | 0.1791 | <i>Galnt3</i>  |
| Kegg | Glycosaminoglycan<br>biosynthesis                           | 1 | 0.1849 | <i>Hs3st5</i>  |
| Kegg | Citrate cycle (TCA cycle)                                   | 1 | 0.2019 | <i>Mdh1</i>    |
| Kegg | Propanoate metabolism                                       | 1 | 0.2019 | <i>Acacb</i>   |
| Kegg | Fructose and mannose<br>metabolism                          | 1 | 0.2296 | <i>Hk3</i>     |
| Kegg | Amino sugar and nucleotide<br>sugar metabolism              | 1 | 0.2718 | <i>Hk3</i>     |
| Kegg | Starch and sucrose<br>metabolism                            | 1 | 0.2718 | <i>Hk3</i>     |
| Kegg | Linoleic acid metabolism                                    | 1 | 0.277  | <i>Cyp2j13</i> |
| Kegg | N-glycan biosynthesis                                       | 1 | 0.282  | <i>Glt28d2</i> |
| Kegg | Glycerolipid metabolism                                     | 1 | 0.3214 | <i>Gyk</i>     |
| Kegg | Glycerophospholipid<br>metabolism                           | 1 | 0.4231 | <i>Ache</i>    |
| Kegg | Glycolysis/gluconeogenesis                                  | 1 | 0.5801 | <i>Hk3</i>     |

TCA, Tricarboxylic acid.
